# Supplementary material
Source: PubMed Central journal article supplement (PMC8381753)
Supplement: NIHMS1729350-supplement-sup_mat.pdf [file NIHMS1729350-supplement-sup_mat.pdf]

SUPPORTING INFORMATION FOR PUBLICATION

**Bio-Inspired Amphoteric Polymer for Triggered-Release Drug Delivery on  
Breast Cancer Cells Based on Metal Coordination.**

*Pin-Chun Chen<sup>a, b</sup>, James J. Lai<sup>c</sup>, Chun-Jen Huang<sup>a, b, d, e, \*</sup>*

<sup>a</sup> Department of Chemical & Materials Engineering, National Central University,  
Jhong-Li, Taoyuan 320, Taiwan.

<sup>b</sup> Department of Biomedical Sciences and Engineering, National Central University,  
Jhong-Li, Taoyuan 320, Taiwan.

<sup>c</sup> Department of Bioengineering, University of Washington, Seattle, Washington  
98195, USA.

<sup>d</sup> R&D Center for Membrane Technology, Chung Yuan Christian University, 200  
Chung Pei Rd., Chung-Li City 32023, Taiwan.

<sup>e</sup> NCU-DSM Research Center, National Central University, Jhong-Li, Taoyuan 320,  
Taiwan.

\* Corresponding author. E-mail: [cjhuang@ncu.edu.tw](mailto:cjhuang@ncu.edu.tw) (C.-J. H.)

Table S1. Abbreviations

| <b>Abbreviation</b> | <b>Term</b>                                                      |
|---------------------|------------------------------------------------------------------|
| NCP                 | nanoscale coordination polymer                                   |
| Cur@NCP             | curcumin-loaded nanoscale coordination polymer                   |
| PMPC                | poly(2-methacryloyloxyethyl phosphorylcholine)                   |
| PserA               | poly(serinyl acrylate)                                           |
| RAFT                | reversible addition-fragmentation chain transfer                 |
| DFO                 | deferoxamine mesylate                                            |
| CPD                 | 4-cyano-4-(phenylcarbonothioylthio) pentanoic acid               |
| ACVA                | 4,4' -azobis (4-cyanovaleric acid)                               |
| MTT                 | 3-(4,5-dimethylthiazol-2-yl)-2,5-diphenyl-2H-tetrazolium bromide |
| M <sub>n</sub>      | polymer molecular weight                                         |
| Đ                   | polydispersity index                                             |

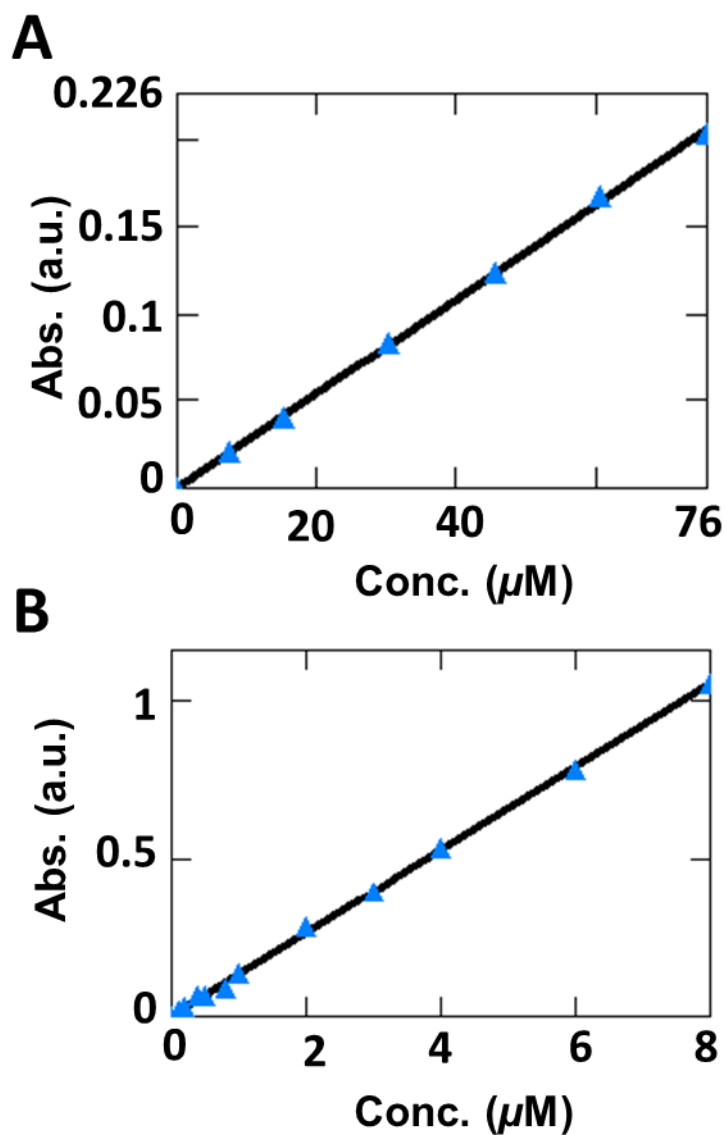

**Figure S1.** (A) Calibration curve of DFO-Fe<sup>3+</sup> complex in water using absorbance at 430 nm. The data was fit with the equation  $A = 0.0027C + 1.74e-5$  ( $r^2 = 0.999$ ), where A is the absorbance and C is the DFO-Fe<sup>3+</sup> complex concentration. (B) Calibration curve of curcumin in acetone using absorbance at 419.6 nm. The data was fit with the equation  $A = 0.132C + 1.86e-3$  ( $r^2 = 0.999$ ), where A is the absorbance and C is the curcumin concentration.

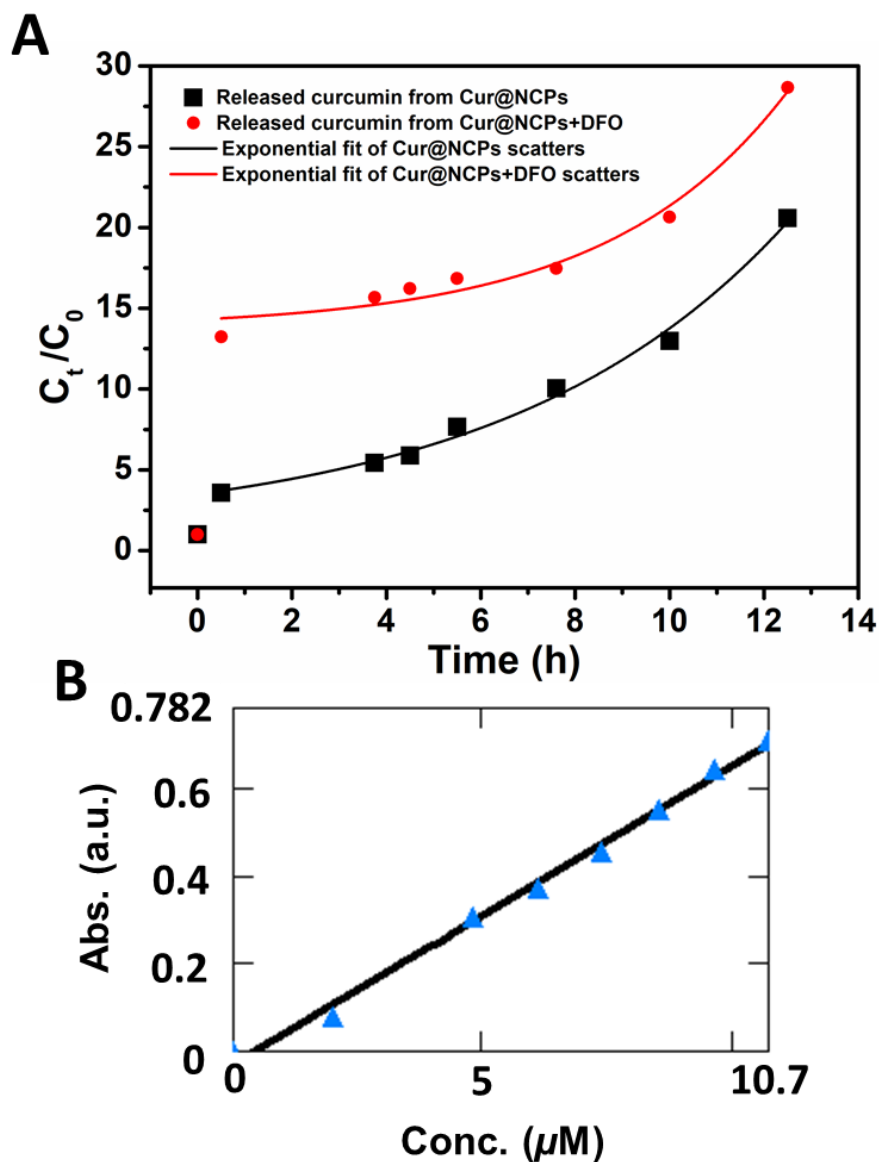

**Figure S2.** (A) Drug release profiles of Cur@NCPs with addition of DFO (red) and without DFO (black). The equation for curve fitting was  $C_t/C_0=C_{0.5}+A*\exp(-k*t)$ , where  $C_t$  is curcumin concentration at time  $t$ ,  $C_0$  is the initial curcumin concentration,  $C_{0.5}$  is curcumin concentration at 0.5 h,  $A$  is the constant of integration, and  $k$  is the release rate constant. (B) Calibration curve of curcumin in PBS containing 0.5% Tween 80 based on absorbance at 425 nm. The data was fit with the equation  $A = 0.0679C - 0.029$  ( $r^2 = 0.994$ ), where  $A$  is the absorbance and  $C$  is the curcumin concentration.

Table S2. Statistics for curves shown in Figure S2A.

| <b>Statistics</b> | <b>Released curcumin<br/>from Cur@NCP</b> | <b>Released curcumin<br/>from Cur@NCP+DFO</b> |
|-------------------|-------------------------------------------|-----------------------------------------------|
| $C_{0.5}$         | 1.18                                      | 13.7                                          |
| <b>A</b>          | 2.33                                      | 0.54                                          |
| <b>k</b>          | 0.17                                      | 0.26                                          |
| $r^2$             | 0.99                                      | 0.96                                          |

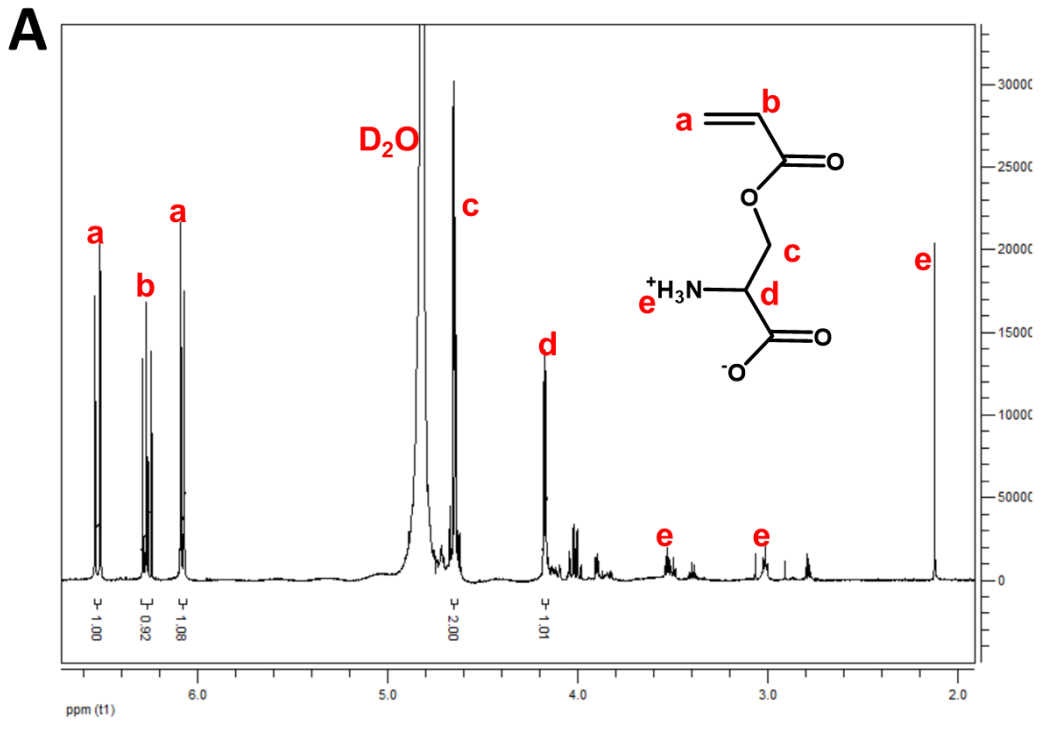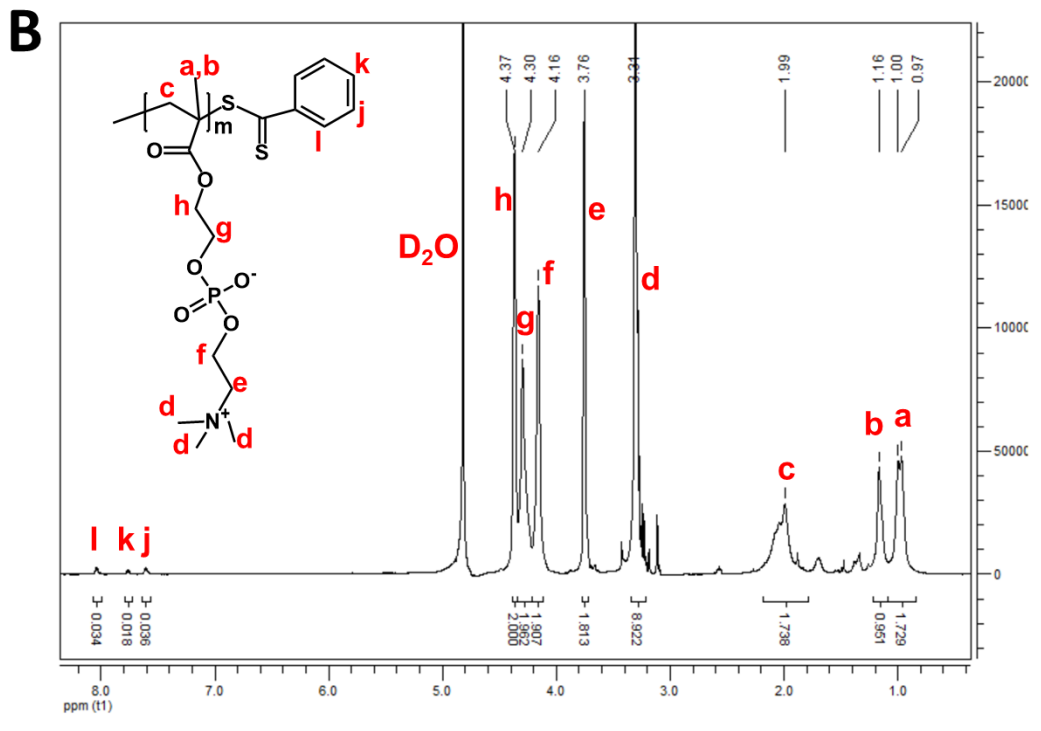

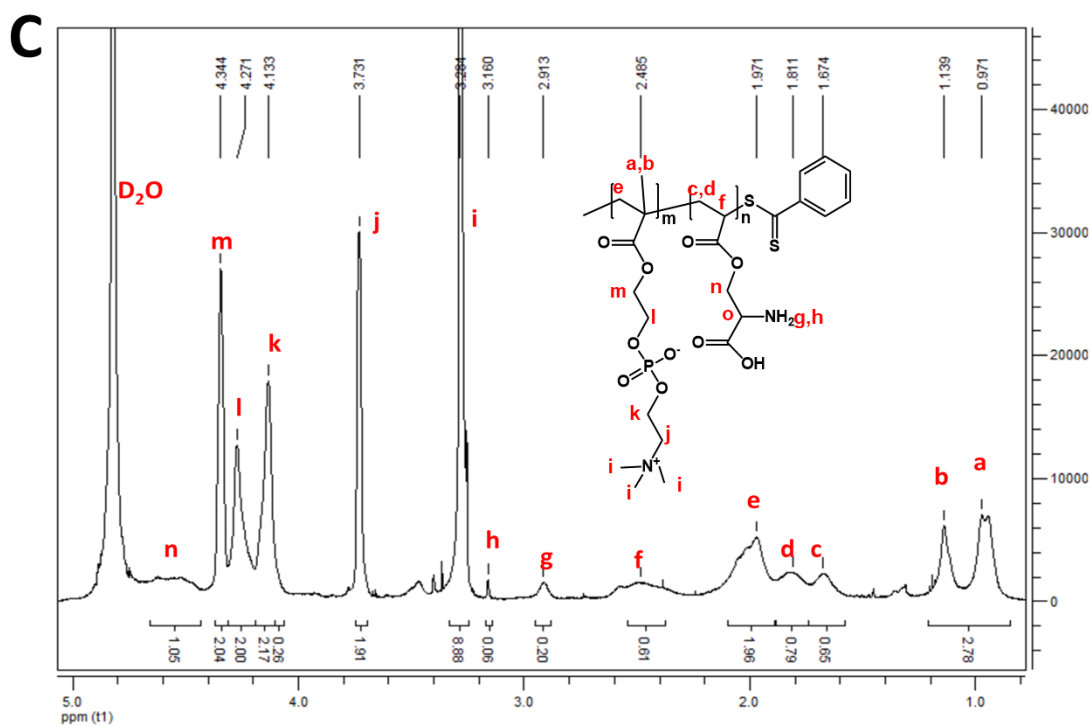

**Figure S3.**  $^1\text{H}$  NMR spectra of (A) serA, (B) PMPC<sub>55</sub>, and (C) PMPC<sub>55</sub>-*b*-PserA<sub>25</sub> in deionized water.

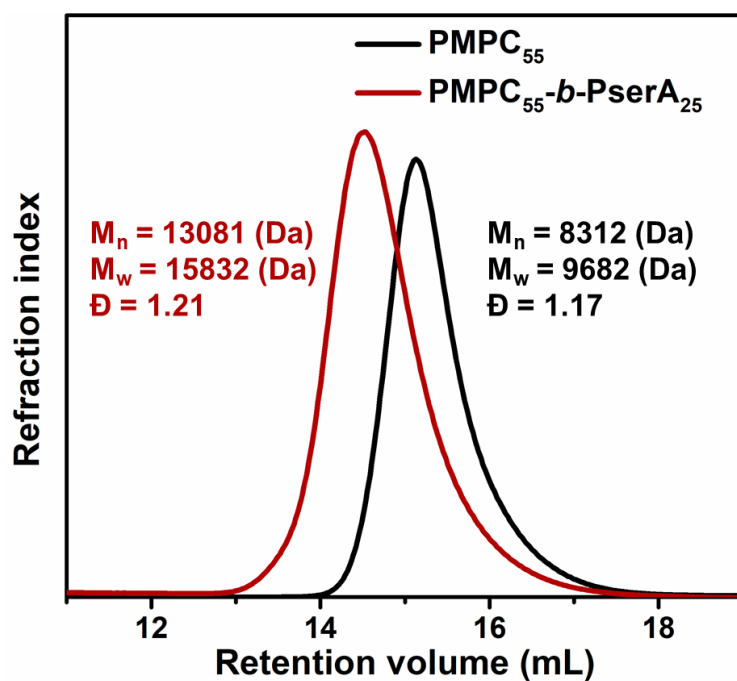

**Figure S4.** GPC chromatograms for PMPC<sub>55</sub> (black) and PMPC<sub>55</sub>-*b*-PserA<sub>25</sub> (red). Polymer molecular weights ( $M_n$ ,  $M_w$ ) and polydispersity indices ( $\bar{D}$ ) were determined by GPC in 0.15 M NaCl eluent at a flow rate of 0.6 mL/min.



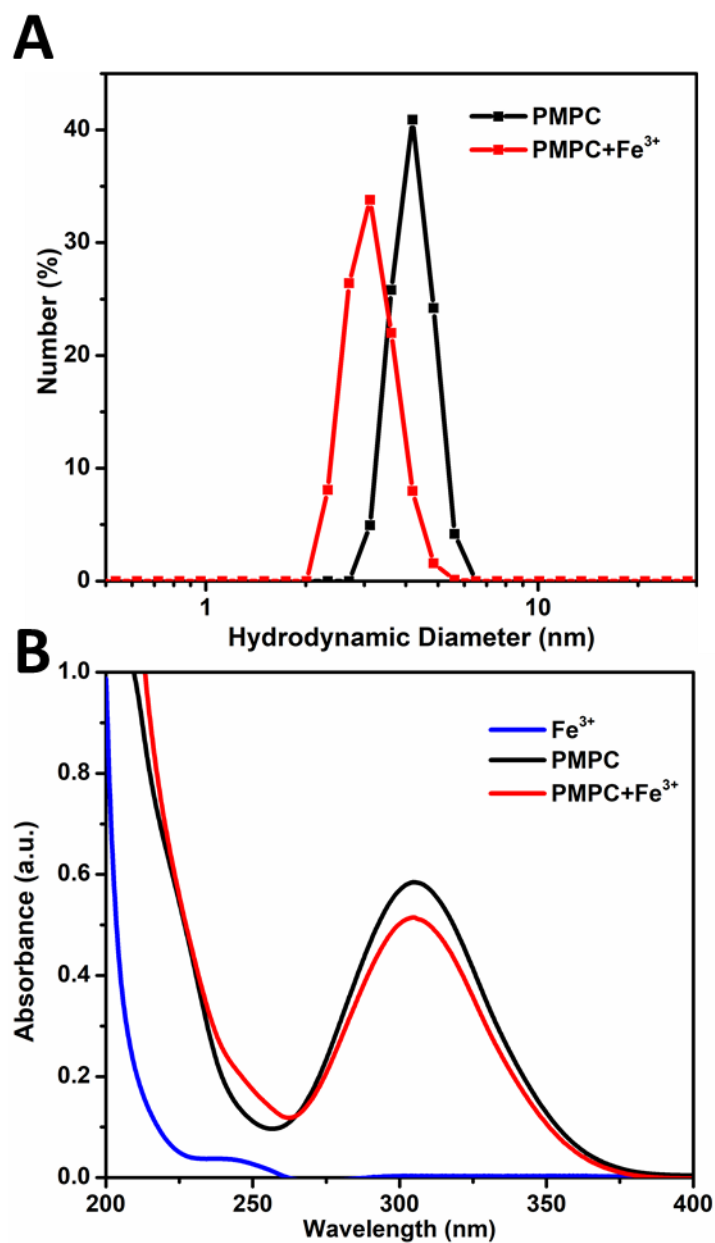

**Figure S5.** (A) DLS measurement of PMPC in the absence of Fe<sup>3+</sup> (black) and in the presence of Fe<sup>3+</sup> (red). (B) UV-vis spectra of FeCl<sub>3(aq)</sub> (Na<sub>2</sub>CO<sub>3</sub> added, and the precipitate filtered), PMPC, and PMPC with FeCl<sub>3</sub> (molar ratio of Fe<sup>3+</sup> to MPC = 3) in PBS.

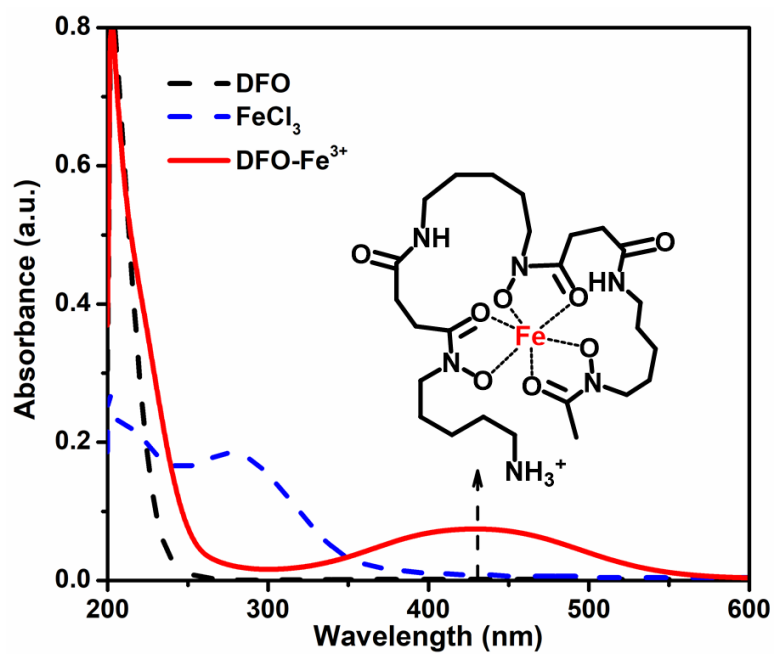

**Figure S6.** UV-vis spectra of FeCl<sub>3</sub> in deionized water, DFO in PBS, and DFO-Fe<sup>3+</sup> complex in PBS.

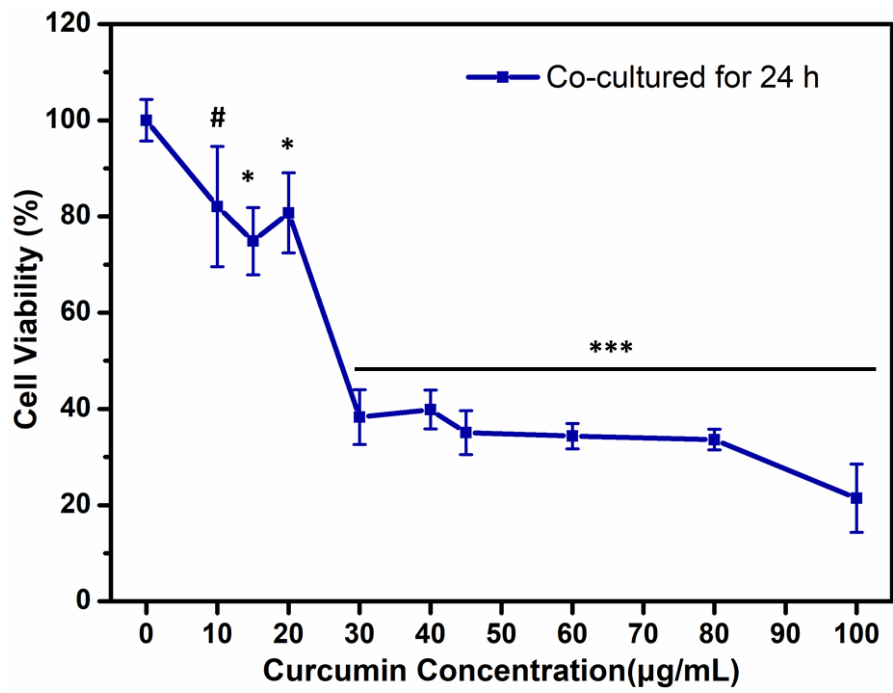

**Figure S7.** Cell viability of MDA-MB-231 breast cancer cells treated with free curcumin.
